# Supplementary material
Source: PubMed Central journal article supplement (PMC4946049)

**a** Glu-CB1 - PR

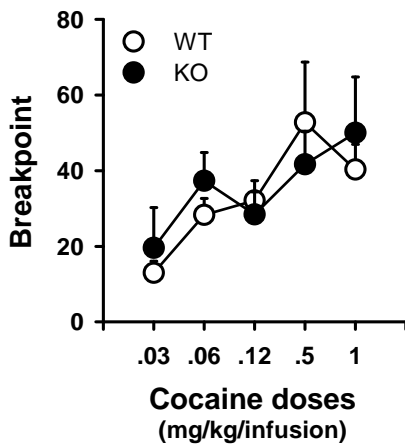

**b** GABA-CB1 - PR

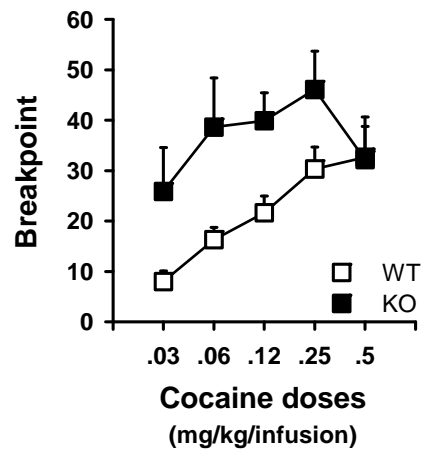

**c** Glu-CB1 - Cue-induced cocaine seeking - session 25

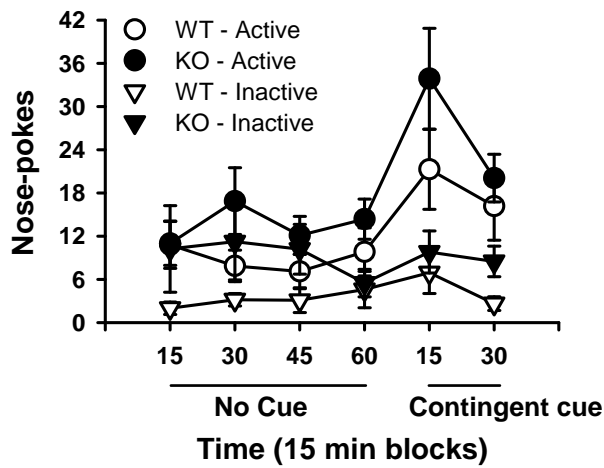

**d** Glu-CB1 - Cue omission

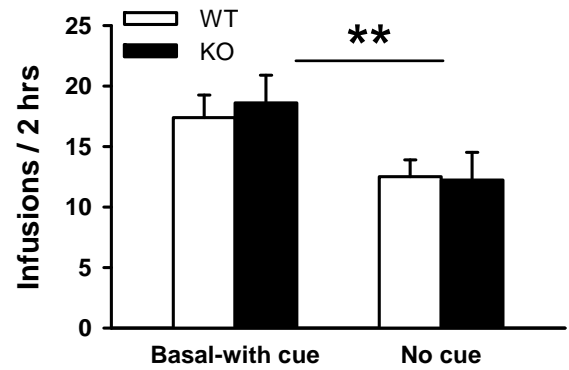

**e** Glu-CB1 - T-maze for food - Reinforced arm reversal

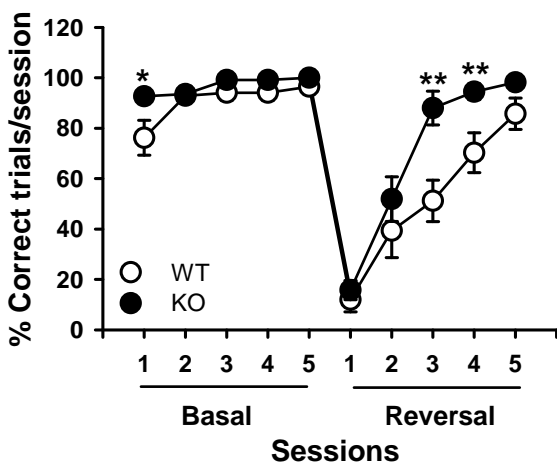

Supplement: npp2015351x2.pdf [file npp2015351x2.pdf]
