# Supplementary material
Source: PubMed Central journal article supplement (PMC4946049)

**a** AMPA/NMDA vs cue-induced cocaine seeking

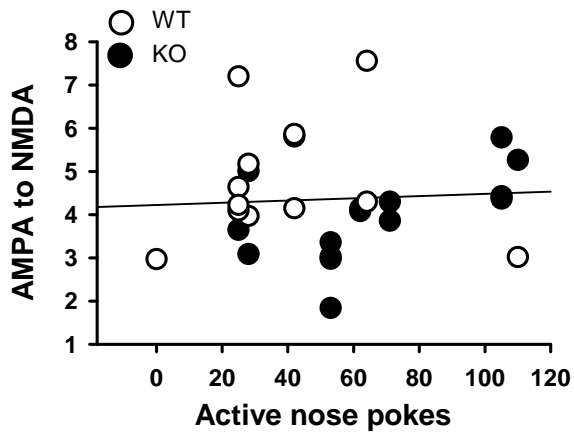

**b** AMPA/NMDA vs reversal

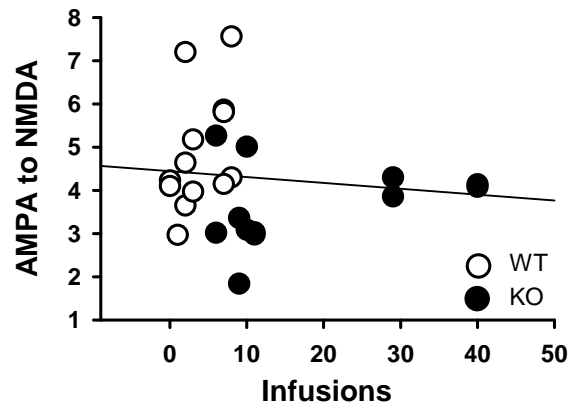

Supplementary Figure 2

Supplement: npp2015351x3.pdf [file npp2015351x3.pdf]
